# Supplementary material for: Jacket temperature regulation allowing well-defined non-adiabatic lab-scale solution free radical polymerization of acrylates
Source: Royal Society of Chemistry journal article supplement (doi:10.1039/d1re00099c), 2021-01-01
Supplement: d1re00099c1.pdf [file d1re00099c1.pdf]

**Supporting Information for**  
**“Jacket temperature regulation allowing well-defined non-adiabatic lab-scale solution free radical polymerization of acrylates”**

Mariya Edeleva,<sup>1,\*</sup> Yoshi W. Marien,<sup>1</sup> Paul H.M. Van Steenberge,<sup>1</sup> Dagmar R. D’hooge<sup>1,2\*</sup>

<sup>1</sup> Laboratory for Chemical Technology (LCT), Ghent University, Technologiepark 125, 9052 Ghent, Belgium.

<sup>2</sup> Centre for Textile Science and Engineering (CTSE), Ghent University, Technologiepark 70A, 9052 Ghent, Belgium.

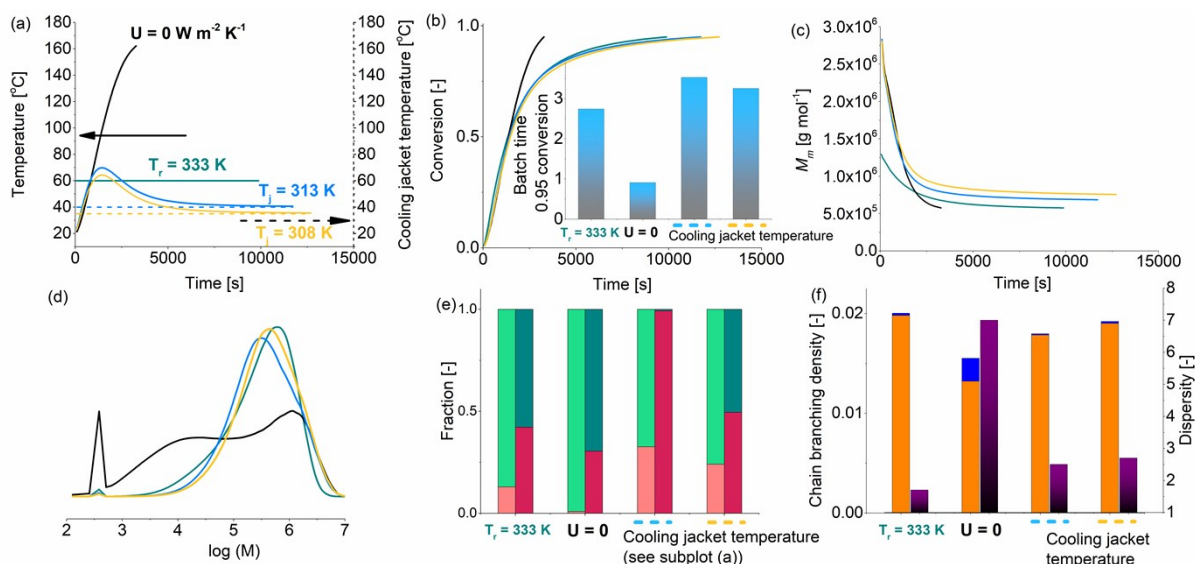

**Figure S1. Comparing adiabatic and non-adiabatic reactor operations for solution free radical polymerization (FRP) of *n*-butyl acrylate (*n*BuA) with  $[n\text{BuA}]_0 = 3.3 \text{ mol L}^{-1}$  and  $T_{r,0} = 298 \text{ K}$  but applying the zeroth order initiation case with AIBN. Evolution of (a) reactor temperature (left axis) and jacket temperature ( $T_{\text{jacket}}$ ; right axis) as a function of time, (b) monomer conversion as a function of time as well the final batch time for 0.9 (monomer) conversion, (c) mass average molar mass  $M_n$  as a function of time and (d) molar mass distribution (MMD) ( $w(\log M)$ ) format at a monomer conversion of 0.90; (e) fractions of macromonomer and dead polymer at a monomer conversion of 0.90 with light- green/red number fraction and dark-green/red: mass fraction, (f) left axis: orange and blue: short and long chain branching density at a monomer conversion of 0.90, (f) right axis in dark-purple dispersity at 0.90 monomer conversion; blue:  $T_{\text{jacket}} = 313 \text{ K}$ , yellow:  $T_{\text{jacket}} = 308 \text{ K}$ , black: adiabatic operation with  $U$  in Equation (1) equal to 0 instead of  $100 \text{ W m}^{-2} \text{ K}^{-1}$  (the dimension of  $U$  is omitted in the figure), dark-cyan: isothermal (theoretical) at  $313 \text{ K}$ ; Arrhenius parameter in Table 1.**

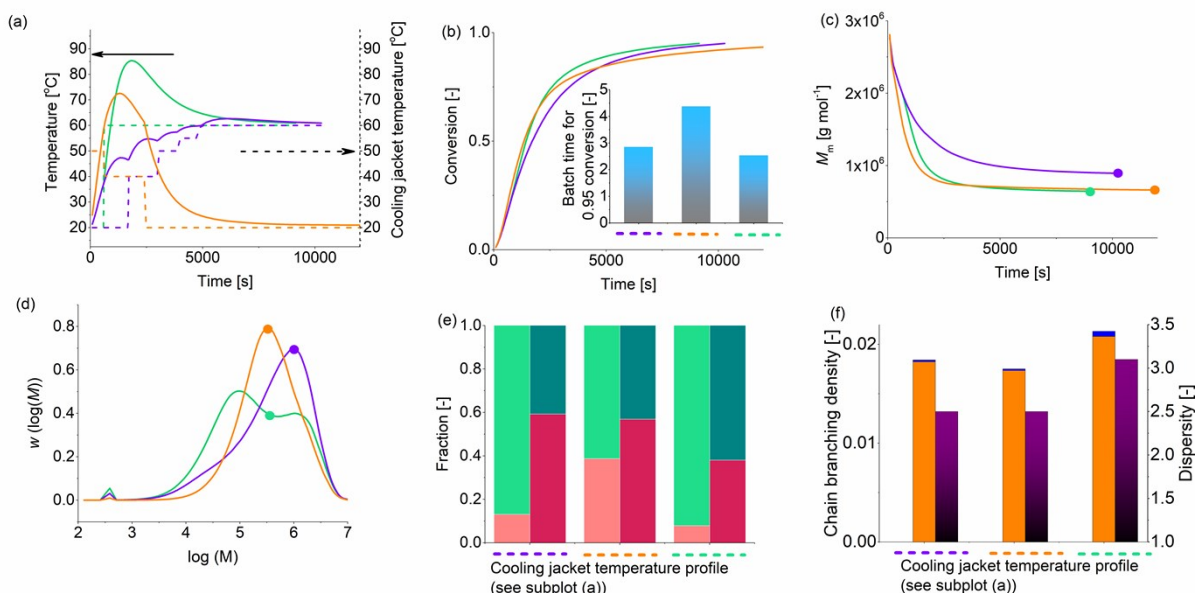

**Figure S2. Same outline as in Supplementary Figure S1 considering three non-adiabatic cases with stepwise jacket temperature ( $T_{\text{jacket}}$ ) control; orange:  $T_{\text{jacket}} = 323, 313, 293 \text{ K}$ , green:  $T_{\text{jacket}} = 293, 333 \text{ K}$ , violet  $T_{\text{jacket}} = 293, 313, 323, 328, 333 \text{ K}$ .**

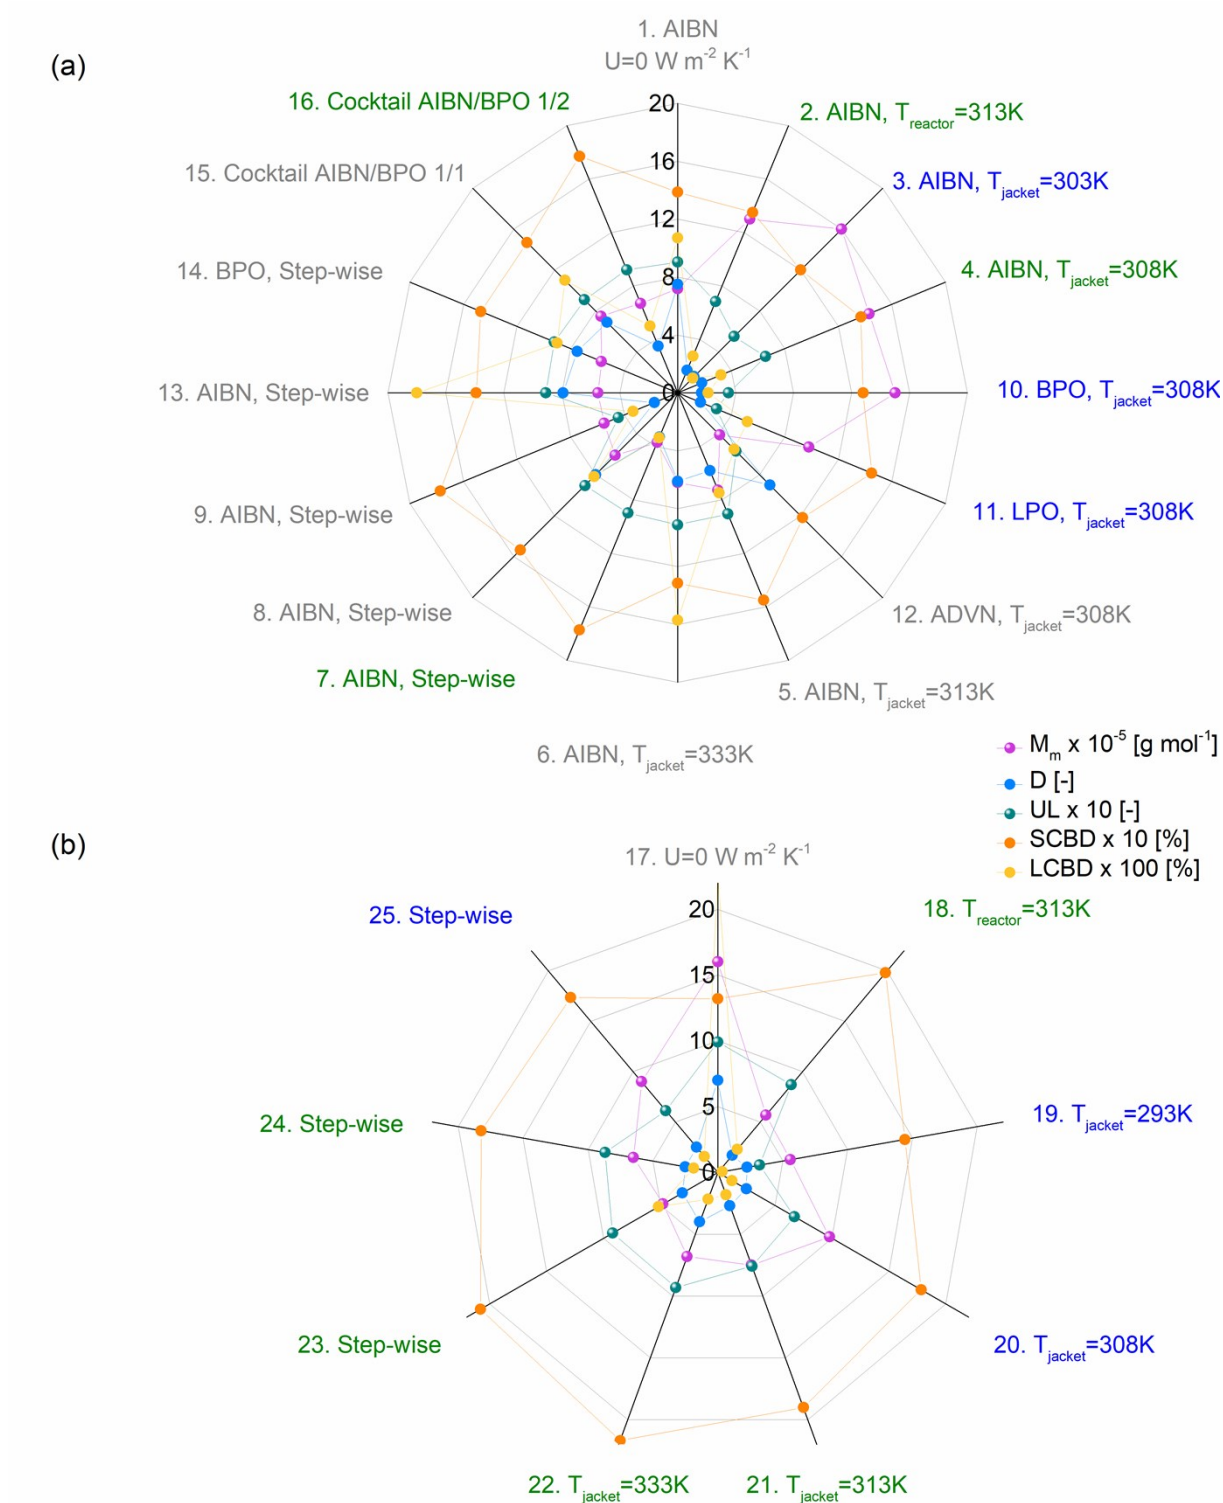

Figure S3. Radar charts with absolute data (normalized in Figure 11).

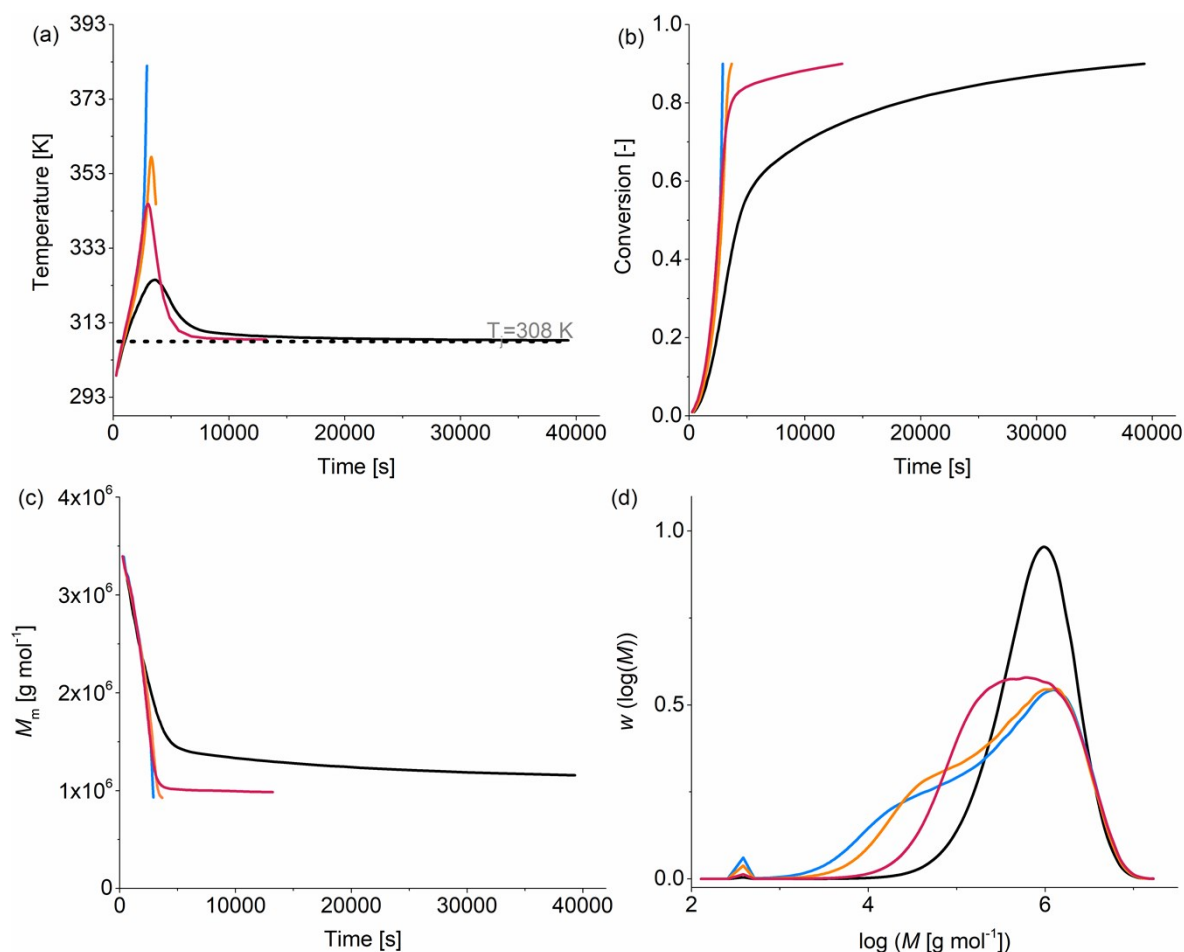

**Figure S4: Influence of under/overestimated activation energies for backbiting and  $\beta$ -scission (while also varying pre-exponential factors) on the predicted: (a) reactor temperature, (b) monomer conversion, (c) mass average molar mass  $M_m$  as a function of time, and (d) log-molar mass distribution (MMD) at 0.9 monomer conversion; flat jacket temperature  $T_{\text{jacket}} = 308$  K. All rate coefficients equal to the reference values listed in Table 1, except for: orange:  $E_a^{\text{backbiting}} = 34.7$  kJ mol<sup>-1</sup>,  $A^{\text{backbiting}} = 1.6 \times 10^8$  s<sup>-1</sup> provided by Barth *et al.*<sup>1</sup> blue:  $E_a^{\text{backbiting}} = 31.7$  kJ mol<sup>-1</sup>,  $A^{\text{backbiting}} = 4.48 \times 10^7$  s<sup>-1</sup> provided by Nikitin *et al.*<sup>2</sup> dark-red:  $E_a^{\text{backbiting}} = 55.0$  kJ mol<sup>-1</sup>,  $A^{\text{backbiting}} = 2.8 \times 10^{11}$  s<sup>-1</sup> provided theoretically by Cuccato *et al.*<sup>3</sup>; black: reference values;  $[M]_0 = 3.3$  mol L<sup>-1</sup>;  $[AIBN]_0 = 3 \times 10^{-3}$  mol L<sup>-1</sup> and  $T_{r,0} = 298$  K;  $U = 100$  W m<sup>-2</sup> K<sup>-1</sup>.**

## References:

1. J. Barth, M. Buback, P. Hesse and T. Sergeeva, *Macromolecules*, 2010, **43**, 4023-4031.
2. A. N. Nikitin, R. A. Hutchinson, M. Buback and P. Hesse, *Macromolecules*, 2007, **40**, 8631-8641.
3. D. Cuccato, E. Mavrouidakis, M. Dossi and D. Moscatelli, *Macromolecular Theory and Simulations*, 2013, **22**, 127-135.
